# Supplementary material for: Chemical characterization of aerosols in the South Asian outflow over the northern Indian Ocean: latitudinal gradients and ultrafine particle events
Source: Royal Society of Chemistry journal article supplement (doi:10.1039/d2ea00130f), 2022-12-22
Supplement: d2ea00130f1.pdf [file d2ea00130f1.pdf]

Supporting Information for

Chemical characterization of aerosols in the South Asian outflow over the Northern Indian Ocean: Latitudinal gradients and ultrafine particle events

*Vijayakumar S. Nair<sup>1\*</sup>, S. Suresh Babu<sup>1</sup>, Sobhan Kumar Kompalli<sup>1</sup>, V. Jayachandran<sup>1,2</sup>, Ajith T.C.<sup>1</sup>, and Mukunda M. Gogoi<sup>1</sup>*

<sup>a</sup> Space Physics Laboratory, Vikram Sarabhai Space Centre, Thiruvananthapuram, India.

<sup>b</sup> National Atmospheric Research Laboratory, Tirupati, India.

\*Corresponding Author: vijayakumarsnair@gmail.com

**Latitudinal gradients of aerosol chemical composition measured during ICARB-2009**

As a part of Integrated campaign for aerosols, gases and radiation budget (ICARB), extensive measurements of aerosol properties were measured over Bay of Bengal during winter 2009, when the airmass over the region was mostly continental. The aerosol chemical composition measurements reported by Srinivas et al., (2011) is used to investigate the latitudinal gradients of OC/sulfate, OC/EC and sulfate/EC.

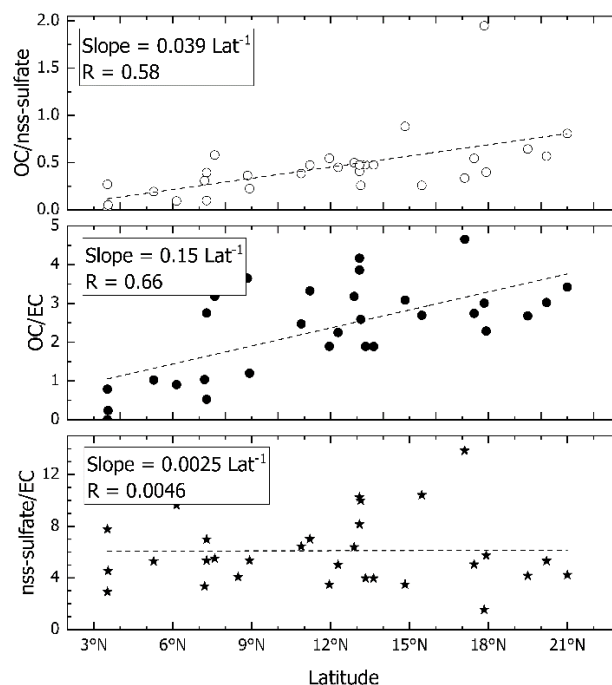

Figure S1: Latitudinal variation of (a) OC/nss-sulfate, (b) OC/EC and (c) nss-sulfate/EC over Bay of Bengal during ICARB-2009. The linear fit of the data is shown as dotted lines. The slope of the

regression line and correlation coefficient are shown in each panel. The chemical composition data is adopted from Srinivas et al., (2011).
